# Supplementary material for: Lead compounds for the development of SARS-CoV-2 3CL protease inhibitors
Source: PubMed Central journal article supplement — bioRxiv. 2020 Aug 4:2020.08.03.235291. Preprint. [Version 1] doi: 10.1101/2020.08.03.235291 (PMC7418712; doi:10.1101/2020.08.03.235291), 2020-08-04
Supplement: NIHPP2020.08.03.235291-supplement-1.pdf [file NIHPP2020.08.03.235291-supplement-1.pdf]

322 **Supplemental Table 1. Data collection and refinement statistics of apo SARS-CoV-2 3CL**  
 323 **protease and 3CL protease bound to compound 4, GC376, and MAC-5576.**

324

|                                       | <i>apo</i> 3CL             | 3CL with<br>Compound 4     | 3CL with<br>GC376          | 3CL with<br>MAC-5576       |
|---------------------------------------|----------------------------|----------------------------|----------------------------|----------------------------|
| <b>Data collection</b>                |                            |                            |                            |                            |
| Space group                           | <i>C</i> 2                 | <i>C</i> 2                 | <i>C</i> 2                 | <i>C</i> 2                 |
| Cell dimensions                       |                            |                            |                            |                            |
| <i>a</i> , <i>b</i> , <i>c</i> (Å)    | 98.7, 82.0, 51.8           | 97.2, 81.9, 54.2           | 98.8, 80.2, 52.0           | 98.3, 82.5, 51.8           |
| $\alpha$ , $\beta$ , $\gamma$ (°)     | 90, 114.9, 90              | 90, 117.1, 90              | 90, 114.3, 90              | 90, 114.83, 90             |
| Resolution (Å)                        | 60.4-1.85<br>(1.88-1.85)*  | 59.5-1.80<br>(1.82-1.80)*  | 59.9-1.83<br>(1.86-1.83)*  | 60.58-1.73<br>(1.76-1.73)* |
| $R_{\text{merge}}$ (%)                | 7.2 (65.7)                 | 18.7 (57.6)                | 14.7 (60.5)                | 4.1 (68.8)                 |
| $I/\sigma I$                          | 13.4 (2.1)                 | 10.2 (2.4)                 | 12.7 (2.2)                 | 23.5 (2.3)                 |
| Completeness (%)                      | 98.9 (97.4)                | 98.8 (99.0)                | 98.5 (96.0)                | 99.2 (88.3)                |
| Redundancy                            | 6.8 (6.5)                  | 6.7 (6.5)                  | 6.9 (6.1)                  | 6.8 (6.6)                  |
| CC1/2                                 | 99.8 (95.1)                | 0.99 (0.91)                | 0.99 (0.93)                | 100 (0.90)                 |
|                                       |                            |                            |                            |                            |
| <b>Refinement</b>                     |                            |                            |                            |                            |
| Resolution (Å)                        | 47.0-1.85<br>(1.88-1.85)*  | 48.2-1.80<br>(1.82-1.80)*  | 47.38-1.83<br>(1.86-1.83)  | 47.0-1.73<br>(1.75-1.73)   |
| No. reflections                       | 31,710 (3,219)             | 34,294 (3,497)             | 31,972 (3,134)             | 38,879 (3,899)             |
| $R_{\text{work}}/R_{\text{free}}$ (%) | 16.8 (25.2)/19.8<br>(29.3) | 18.7 (25.7)/22.3<br>(30.7) | 17.4 (25.0)/20.6<br>(28.7) | 16.6 (26.8)/19.0<br>(27.6) |
| No. atoms                             |                            |                            |                            |                            |
| Protein                               | 2,329                      | 2,370                      | 2,340                      | 2,298                      |
| Ligand/ion                            | 5                          | 44                         | 28                         | 16                         |
| Water                                 | 128                        | 293                        | 163                        | 245                        |
| B-factors                             |                            |                            |                            |                            |
| Protein                               | 50.0                       | 35.2                       | 41.4                       | 40.5                       |
| Ligand/ion                            | 52.6                       | 36.6                       | 42.4                       | 43.7                       |
| Water                                 | 53.5                       | 46.7                       | 48.2                       | 50.7                       |
| R.m.s deviations                      |                            |                            |                            |                            |
| Bond lengths (Å)                      | 0.006                      | 0.007                      | 0.006                      | 0.006                      |
| Bond angles (°)                       | 0.8                        | 0.8                        | 0.8                        | 0.8                        |

325 \*Highest resolution shell is shown in parenthesis.

326

327
